# Supplementary material
Source: PubMed Central journal article supplement (PMC7583674)
Supplement: NIHMS1624455-supplement-1.pdf [file NIHMS1624455-supplement-1.pdf]

**eTable.** Numbers and percentage for all figures.

| Response                                                                                                                                                                                                 | No. (%)    |
|----------------------------------------------------------------------------------------------------------------------------------------------------------------------------------------------------------|------------|
| <b>Figure 1. Approximately how often do you see the following patient populations in your practice?</b>                                                                                                  |            |
| a. Patients at risk for infective endocarditis (as per the 2007 American Heart Association guidelines*)                                                                                                  |            |
| Never                                                                                                                                                                                                    | 26 (1.2)   |
| Less than once per year                                                                                                                                                                                  | 158 (7.3)  |
| Once per year                                                                                                                                                                                            | 407 (18.8) |
| Once per month                                                                                                                                                                                           | 811 (37.4) |
| Once per week                                                                                                                                                                                            | 405 (18.7) |
| Multiple times per week                                                                                                                                                                                  | 362 (16.7) |
| b. Patients with a prosthetic knee or hip joint                                                                                                                                                          |            |
| Never                                                                                                                                                                                                    | 1 (0.0)    |
| Less than once per year                                                                                                                                                                                  | 69 (3.2)   |
| Once per year                                                                                                                                                                                            | 101 (4.7)  |
| Once per month                                                                                                                                                                                           | 131 (6.0)  |
| Once per week                                                                                                                                                                                            | 461 (21.3) |
| Multiple times per week                                                                                                                                                                                  | 511 (23.6) |
| 895 (41.3)                                                                                                                                                                                               |            |
| <b>Figure 2A. Thinking about the 2007 American Heart Association guidelines and your patients who are at risk for infective endocarditis, to what extent do you agree with the following statements?</b> |            |
| a. The 2007 American Heart Association guidelines on the use of antibiotic prophylaxis are well defined and clear.                                                                                       |            |
| Strongly disagree                                                                                                                                                                                        | 3 (0.1)    |
| Somewhat disagree                                                                                                                                                                                        | 35 (1.6)   |
| Neither disagree nor agree                                                                                                                                                                               | 267 (12.3) |
| Somewhat agree                                                                                                                                                                                           | 183 (8.4)  |
| Strongly agree                                                                                                                                                                                           | 971 (44.8) |
| 710 (32.7)                                                                                                                                                                                               |            |
| b. Guidelines concerning the use of antibiotic prophylaxis for patients with prosthetic joints are well defined and clear.                                                                               |            |
| Strongly disagree                                                                                                                                                                                        | 2 (0.1)    |
| Somewhat disagree                                                                                                                                                                                        | 332 (15.3) |
| Neither disagree or agree                                                                                                                                                                                | 559 (25.8) |
| Somewhat agree                                                                                                                                                                                           | 219 (10.1) |
| Strongly agree                                                                                                                                                                                           | 703 (32.4) |
| 354 (16.3)                                                                                                                                                                                               |            |
| <b>Figure 2B. Thinking about the 2007 American Heart Association guidelines and your patients who are at risk for infective endocarditis, to what extent do you agree with the following statements?</b> |            |
| a. The patient groups who should receive antibiotic prophylaxis are well defined and clear. (IE <sup>†</sup> )                                                                                           |            |
| Strongly disagree                                                                                                                                                                                        | 3 (0.1)    |
| Somewhat disagree                                                                                                                                                                                        | 55 (2.5)   |
| Neither disagree nor agree                                                                                                                                                                               | 307 (14.2) |
| Somewhat agree                                                                                                                                                                                           | 189 (8.7)  |
| Strongly agree                                                                                                                                                                                           | 963 (44.4) |
| 652 (30.1)                                                                                                                                                                                               |            |

\* Wilson and colleagues.<sup>13</sup> † IE: Infective endocarditis. ‡ PJI: Prosthetic joint infection.

eTable. Continued

| Response                                                                                                                                                  | No. (%)    |
|-----------------------------------------------------------------------------------------------------------------------------------------------------------|------------|
| <b>b. The patient groups (for example, knee replacement, hip replacement) who should receive antibiotic prophylaxis are well defined and clear. (PJI)</b> |            |
|                                                                                                                                                           | 2 (0.1)    |
| Strongly disagree                                                                                                                                         | 308 (14.2) |
| Somewhat disagree                                                                                                                                         | 573 (26.4) |
| Neither disagree or agree                                                                                                                                 | 261 (12.0) |
| Somewhat agree                                                                                                                                            | 655 (30.2) |
| Strongly agree                                                                                                                                            | 370 (17.1) |

**Figure 2C. Thinking about the 2007 American Heart Association guidelines and your patients who are at risk for infective endocarditis, to what extent do you agree with the following statements?**

|                                                                                                       |            |
|-------------------------------------------------------------------------------------------------------|------------|
| <b>a. The dental procedures that require antibiotic prophylaxis are well defined and clear. (IE)</b>  |            |
|                                                                                                       | 1 (0.0)    |
| Strongly disagree                                                                                     | 65 (3.0)   |
| Somewhat disagree                                                                                     | 322 (14.8) |
| Neither disagree nor agree                                                                            | 221 (10.2) |
| Somewhat agree                                                                                        | 913 (42.1) |
| Strongly agree                                                                                        | 647 (29.8) |
| <b>b. The dental procedures that require antibiotic prophylaxis are well defined and clear. (PJI)</b> |            |
|                                                                                                       | 2 (0.1)    |
| Strongly disagree                                                                                     | 203 (9.4)  |
| Somewhat disagree                                                                                     | 452 (20.8) |
| Neither disagree or agree                                                                             | 291 (13.4) |
| Somewhat agree                                                                                        | 758 (34.9) |
| Strongly agree                                                                                        | 463 (21.3) |

**Figure 2D. Thinking about the 2007 American Heart Association guidelines and your patients who are at risk for infective endocarditis, to what extent do you agree with the following statements?**

|                                                                                                     |              |
|-----------------------------------------------------------------------------------------------------|--------------|
| <b>a. The antibiotic prophylaxis regimens (drugs and dosages) are well defined and clear. (IE)</b>  |              |
|                                                                                                     | 1 (0.0)      |
| Strongly disagree                                                                                   | 30 (1.4)     |
| Somewhat disagree                                                                                   | 107 (4.9)    |
| Neither disagree nor agree                                                                          | 119 (5.5)    |
| Somewhat agree                                                                                      | 692 (31.9)   |
| Strongly agree                                                                                      | 1,220 (56.2) |
| <b>b. The antibiotic prophylaxis regimens (drugs and dosages) are well defined and clear. (PJI)</b> |              |
|                                                                                                     | 2 (0.1)      |
| Strongly disagree                                                                                   | 129 (5.9)    |
| Somewhat disagree                                                                                   | 240 (11.1)   |
| Neither disagree or agree                                                                           | 192 (8.9)    |
| Somewhat agree                                                                                      | 730 (33.7)   |
| Strongly agree                                                                                      | 876 (40.4)   |

**Figure 3A. Thinking about the 2007 American Heart Association guidelines and your patients who are at risk for infective endocarditis, to what extent do you agree with the following statements?**

|                                                                                                                                               |            |
|-----------------------------------------------------------------------------------------------------------------------------------------------|------------|
| <b>a. I feel the need to consult with the patient's cardiologist or physician about whether or not antibiotic prophylaxis is needed. (IE)</b> |            |
|                                                                                                                                               | 1 (0.0)    |
| Strongly disagree                                                                                                                             | 234 (10.8) |
| Somewhat disagree                                                                                                                             | 513 (23.7) |
| Neither disagree nor agree                                                                                                                    | 367 (16.9) |
| Somewhat agree                                                                                                                                | 653 (30.1) |
| Strongly agree                                                                                                                                | 401 (18.5) |

eTable. Continued

| Response                                                                                                                                | No. (%)    |
|-----------------------------------------------------------------------------------------------------------------------------------------|------------|
| b. I feel the need to consult with the patient's orthopedist or physician about whether or not anti-biotic prophylaxis is needed. (PJI) |            |
|                                                                                                                                         | 2 (0.1)    |
| Strongly disagree                                                                                                                       | 210 (9.7)  |
| Somewhat disagree                                                                                                                       | 367 (16.9) |
| Neither disagree or agree                                                                                                               | 322 (14.8) |
| Somewhat agree                                                                                                                          | 661 (30.5) |
| Strongly agree                                                                                                                          | 607 (28.0) |

**Figure 3B. Thinking about the 2007 American Heart Association guidelines and your patients who are at risk for infective endocarditis, to what extent do you agree with the following statements?**

|                                                                                                                                                                     |            |
|---------------------------------------------------------------------------------------------------------------------------------------------------------------------|------------|
| a. I think the patient's cardiologist or physician should decide if a patient needs antibiotic prophylaxis when undergoing invasive dental procedures. (IE)         |            |
|                                                                                                                                                                     | 3 (0.1)    |
| Strongly disagree                                                                                                                                                   | 165 (7.6)  |
| Somewhat disagree                                                                                                                                                   | 308 (14.2) |
| Neither disagree nor agree                                                                                                                                          | 320 (14.8) |
| Somewhat agree                                                                                                                                                      | 612 (28.2) |
| Strongly agree                                                                                                                                                      | 761 (35.1) |
| b. I feel the patient's orthopedist or physician should decide if a patient should receive antibiotic prophylaxis when undergoing invasive dental procedures. (PJI) |            |
|                                                                                                                                                                     | 3 (0.1)    |
| Strongly disagree                                                                                                                                                   | 158 (7.3)  |
| Somewhat disagree                                                                                                                                                   | 242 (11.2) |
| Neither disagree or agree                                                                                                                                           | 230 (10.6) |
| Somewhat agree                                                                                                                                                      | 611 (28.2) |
| Strongly agree                                                                                                                                                      | 925 (42.6) |

**Figure 4. I prescribe alternative antibiotics (for example, metronidazole) rather than those recommended by the American Heart Association or American Dental Association for my patients who require antibiotic prophylaxis prior to dental procedures.**

|                            |              |
|----------------------------|--------------|
|                            | 1 (0.0)      |
| Strongly disagree          | 1,834 (84.6) |
| Somewhat disagree          | 209 (9.6)    |
| Neither disagree nor agree | 85 (3.9)     |
| Somewhat agree             | 21 (1.0)     |
| Strongly agree             | 19 (0.9)     |

**Figure 5. Thinking about the antibiotic prophylaxis regimens (drugs and dosages), if a patient's physician or surgeon advises prescribing antibiotic prophylaxis that is not consistent with the standard guidelines, would you most likely (select 1 response):**

|                                                                                                                 |            |
|-----------------------------------------------------------------------------------------------------------------|------------|
|                                                                                                                 | 12 (0.6)   |
| Follow the physician or surgeon's instructions and write the prescription.                                      | 540 (24.9) |
| Ask the physician or surgeon to provide the prescription to the patient.                                        | 973 (44.9) |
| Call the patient's physician or surgeon to discuss the issue.                                                   | 449 (20.7) |
| Follow the guideline, even though the guideline recommendation is contrary to that of the physician or surgeon. | 87 (4.0)   |
| This situation never happens in my practice.                                                                    | 108 (5.0)  |

eTable. Continued

| Response                                                                                                                                                                                                                              | No. (%)      |
|---------------------------------------------------------------------------------------------------------------------------------------------------------------------------------------------------------------------------------------|--------------|
| <b>Figure 6. The American Heart Association guidelines recommend a specific dose of antibiotic given 30-60 minutes before the procedure. How often do you give prophylactic antibiotics for longer than the one recommended dose?</b> |              |
|                                                                                                                                                                                                                                       | 4 (0.2)      |
| Never                                                                                                                                                                                                                                 | 1,180 (54.4) |
| Rarely                                                                                                                                                                                                                                | 695 (32.0)   |
| Sometimes                                                                                                                                                                                                                             | 191 (8.8)    |
| Often                                                                                                                                                                                                                                 | 67 (3.1)     |
| Always                                                                                                                                                                                                                                | 32 (1.5)     |
| <b>Figure 7. To what extent do you agree that antibiotic prophylaxis prevents infection in the following patient populations?</b>                                                                                                     |              |
| a. Patients with a prosthetic hip or knee joint                                                                                                                                                                                       |              |
|                                                                                                                                                                                                                                       | 4 (0.2)      |
| Strongly disagree                                                                                                                                                                                                                     | 318 (14.7)   |
| Somewhat disagree                                                                                                                                                                                                                     | 489 (22.5)   |
| Neither disagree nor agree                                                                                                                                                                                                            | 420 (19.4)   |
| Somewhat agree                                                                                                                                                                                                                        | 617 (28.4)   |
| Strongly agree                                                                                                                                                                                                                        | 321 (14.8)   |
| b. Patients with coronary artery bypass grafts                                                                                                                                                                                        |              |
|                                                                                                                                                                                                                                       | 4 (0.2)      |
| Strongly disagree                                                                                                                                                                                                                     | 382 (17.6)   |
| Somewhat disagree                                                                                                                                                                                                                     | 421 (19.4)   |
| Neither disagree nor agree                                                                                                                                                                                                            | 448 (20.7)   |
| Somewhat agree                                                                                                                                                                                                                        | 587 (27.1)   |
| Strongly agree                                                                                                                                                                                                                        | 327 (15.1)   |
| c. Patients with a prosthetic heart valve                                                                                                                                                                                             |              |
|                                                                                                                                                                                                                                       | 4 (0.2)      |
| Strongly disagree                                                                                                                                                                                                                     | 51 (2.4)     |
| Somewhat disagree                                                                                                                                                                                                                     | 111 (5.1)    |
| Neither disagree nor agree                                                                                                                                                                                                            | 265 (12.2)   |
| Somewhat agree                                                                                                                                                                                                                        | 837 (38.6)   |
| Strongly agree                                                                                                                                                                                                                        | 901 (41.5)   |
| d. Patients with a heart murmur                                                                                                                                                                                                       |              |
|                                                                                                                                                                                                                                       | 5 (0.2)      |
| Strongly disagree                                                                                                                                                                                                                     | 713 (32.9)   |
| Somewhat disagree                                                                                                                                                                                                                     | 609 (28.1)   |
| Neither disagree nor agree                                                                                                                                                                                                            | 475 (21.9)   |
| Somewhat agree                                                                                                                                                                                                                        | 256 (11.8)   |
| Strongly agree                                                                                                                                                                                                                        | 111 (5.1)    |
| <b>Figure 8. Do you ever prescribe, or request prescriptions, for antibiotic prophylaxis prior to invasive dental procedures in your office for patients with:</b>                                                                    |              |
| a. Immunosuppression from systemic steroids                                                                                                                                                                                           |              |
|                                                                                                                                                                                                                                       | 5 (0.2)      |
| No                                                                                                                                                                                                                                    | 556 (25.6)   |
| Yes                                                                                                                                                                                                                                   | 324 (14.9)   |
| I defer to the patient's physician.                                                                                                                                                                                                   | 128 (59.2)   |
| b. Immunosuppression from cancer chemotherapy drugs                                                                                                                                                                                   |              |
|                                                                                                                                                                                                                                       | 4 (0.2)      |
| No                                                                                                                                                                                                                                    | 357 (16.5)   |
| Yes                                                                                                                                                                                                                                   | 393 (18.1)   |
| I defer to the patient's physician.                                                                                                                                                                                                   | 141 (65.2)   |

eTable. Continued

| Response                                                                                                                                        | No. (%)      |
|-------------------------------------------------------------------------------------------------------------------------------------------------|--------------|
| c. Immunosuppression from drugs following organ transplantation                                                                                 |              |
|                                                                                                                                                 | 4 (0.2)      |
| No                                                                                                                                              | 253 (11.7)   |
| Yes                                                                                                                                             | 486 (22.4)   |
| I defer to the patient's physician.                                                                                                             | 1,426 (65.7) |
| d. Immunosuppression from disease (for example, HIV and AIDS)                                                                                   |              |
|                                                                                                                                                 | 4 (0.2)      |
| No.                                                                                                                                             | 509 (23.5)   |
| Yes                                                                                                                                             | 328 (15.1)   |
| I defer to the patient's physician.                                                                                                             | 1,328 (61.2) |
| e. Insulin-dependent diabetes                                                                                                                   |              |
|                                                                                                                                                 | 4 (0.2)      |
| No                                                                                                                                              | 1,086 (50.1) |
| Yes                                                                                                                                             | 335 (15.4)   |
| I defer to the patient's physician.                                                                                                             | 744 (34.3)   |
| <b>Figure 9. To what extent do you agree that each of the following dental procedures put some patients at risk for infective endocarditis?</b> |              |
| a. Routine oral hygiene home care (for example, brushing and flossing)                                                                          |              |
|                                                                                                                                                 | 4 (0.2)      |
| Strongly disagree                                                                                                                               | 679 (31.3)   |
| Somewhat disagree                                                                                                                               | 496 (22.9)   |
| Neither disagree nor agree                                                                                                                      | 315 (14.5)   |
| Somewhat agree                                                                                                                                  | 525 (24.2)   |
| Strongly agree                                                                                                                                  | 150 (6.9)    |
| b. Single tooth extraction                                                                                                                      |              |
| .                                                                                                                                               | 5 (0.2)      |
| Strongly disagree                                                                                                                               | 79 (3.6)     |
| Somewhat disagree                                                                                                                               | 205 (9.5)    |
| Neither disagree nor agree                                                                                                                      | 202 (9.3)    |
| Somewhat agree                                                                                                                                  | 1,030 (47.5) |
| Strongly agree                                                                                                                                  | 648 (29.9)   |
| c. Routine dental scaling                                                                                                                       |              |
| .                                                                                                                                               | 5 (0.2)      |
| Strongly disagree                                                                                                                               | 140 (6.5)    |
| Somewhat disagree                                                                                                                               | 310 (14.3)   |
| Neither disagree nor agree                                                                                                                      | 247 (11.4)   |
| Somewhat agree                                                                                                                                  | 943 (43.5)   |
| Strongly agree                                                                                                                                  | 524 (24.2)   |
| d. Restorations that involve the gingival margin (for example, crowns, multisurface restorations)                                               |              |
|                                                                                                                                                 | 5 (0.2)      |
| Strongly disagree                                                                                                                               | 250 (11.5)   |
| Somewhat disagree                                                                                                                               | 529 (24.4)   |
| Neither disagree nor agree                                                                                                                      | 393 (18.1)   |
| Somewhat agree                                                                                                                                  | 724 (33.4)   |
| Strongly agree                                                                                                                                  | 268 (12.4)   |

eTable. Continued

| Response                             | No. (%)              |
|--------------------------------------|----------------------|
| e. Dental local anesthetic injection |                      |
|                                      | 4 (0.2)              |
| Strongly disagree                    | 735 (33.9)           |
| Somewhat disagree                    | 633 (29.2)           |
| Neither disagree nor agree           | 383 (17.7)           |
| Somewhat agree                       | 305 (14.1)           |
| Strongly agree                       | 109 (5.0)            |
| <b>Total</b>                         | <b>2,169 (100.0)</b> |
